# Supplementary material for: Chemical Composition and Antimicrobial Properties of Honey Bee Venom
Source: MDPI journal article supplement (doi:10.3390/molecules28104135), 2023-05-17
Supplement: s1 [file s1]

## Supplement of

# Chemical Composition and Antimicrobial Properties of Honey Bee Venom

Valery Isidorov, Adam Zalewski, Grzegorz Zambrowski, Izabela Swiecicka

Correspondence to: Valery A. Isidorov (v.isidorov@pb.edu.pl; Isidorov@uwb.edu.pl)

**Table S1.** Chemical composition of volatiles from dry and fresh honey bee venom

| Compound               | CAS        | RI <sup>Calc</sup> | RI <sup>Lit</sup> | Dry bee venom |       | Stinging apparatus |       |
|------------------------|------------|--------------------|-------------------|---------------|-------|--------------------|-------|
|                        |            |                    |                   | Dv-1          | Dv-2  | Fv-1               | Fv-2  |
| Ethanol                | 64-17-5    | -                  | 484               | 1.46          | 0.50  | 0.33               | 0.26  |
| Acetone                | 67-64-1    | -                  | 501               | 0.59          | trace | 0.15               | 2.30  |
| Isobutanal             | 78-84-2    | -                  | 554               | 1.88          | -     | -                  | -     |
| Formic acid            | 64-18-6    | -                  | 519               | 2.37          | -     | -                  | -     |
| 2-Butanone             | 78-93-3    | -                  | 598               | trace         | 0.18  | 1.18               | 1.56  |
| n-Hexane               | 110-54-3   | 600                | 600               | 2.62          | -     | -                  | -     |
| Ethyl acetate          | 141-78-6   | 606                | 610               | 0.95          | trace | 0.54               | trace |
| Acetic acid            | 64-19-7    | 612                | 599               | 6.60          | 3.00  | 7.97               | 7.83  |
| Isobutanol             | 78-83-1    | 624                | 625               | -             | 2.45  | -                  | -     |
| Isopentanal            | 590-89-3   | 648                | 652               | -             | 0.71  | -                  | -     |
| 1-Butanol              | 71-36-3    | 664                | 660               | -             | 2.05  | -                  | -     |
| 2-Pentanone            | 107-87-9   | 700                | 702               | 1.37          | trace | 0.40               | 0.73  |
| 2-Pentanol             | 6032-29-7  | 705                | 706               | -             | 0.77  | 0.56               | --    |
| Propanoic acid         | 79-09-4    | 722                | 732               | -             | -     | 0.28               | -     |
| Acetoin                | 513-86-0   | 723                | 723               | -             | -     | 0.52               | -     |
| 2,3-Butanediol-1       | 5341-95-7  | 734                | 737               | -             | -     | 0.13               | trace |
| Isopentanol            | 123-51-3   | 736                | 734               | 0.40          | 28.9  | 3.56               | 5.10  |
| 2-Methylbutan-1-ol     | 137-32-6   | 739                | 738               | -             | -     | 0.99               | -     |
| Pyridine               | 110-86-1   | 740                | 742               | 0.46          | -     | 0.52               | 0.71  |
| Toluene                | 108-88-3   | 761                | 761               | 3.40          | 1.15  | 1.93               | 1.42  |
| Isobutyric acid        | 79-31-2    | 762                | 765               | -             | -     | 0.60               | 0.91  |
| 3-Methyl-2-butenal     | 107-86-8   | 782                | 782               | -             | 0.70  | -                  | -     |
| 2,3-Butanediol-2       | 6982-25-8  | 782                | 779               | -             | -     | 0.09               | 0.24  |
| Butanoic acid          | 107-92-6   | 798                | 799               | trace         | trace | 0.59               | 0.50  |
| n-Octane               | 111-65-9   | 800                | 800               | -             | 0.26  | 0.14               | -     |
| Hexanal                | 66-25-1    | 802                | 802               | 1.73          | -     | -                  | -     |
| 3-Methyl-1-pentanol    | 589-35-5   | 842                | 839               | -             | 0.43  | -                  | -     |
| (E)-3-Hexen-1-ol       | 928-97-2   | 850                | 852               | -             | 0.73  | -                  | 0.23  |
| 2,4-Dimethyl-1-heptene | 19549-87-2 | 837                | 842               | 0.08          | -     | -                  | -     |
| 3-Hexen-1-ol           | 928-96-1   | 851                | 855               | -             | -     | 0.34               | -     |
| Ethyl benzene          | 100-41-4   | 857                | 862               | -             | -     | 0.32               | -     |
| p-Xylene               | 106-42-3   | 866                | 866               | -             | -     | 0.64               | -     |

|                                     |            |      |      |       |       |      |       |
|-------------------------------------|------------|------|------|-------|-------|------|-------|
| Isovaleric acid                     | 503-74-2   | 866  | 870  | 0.07  | -     | 0.71 | -     |
| 1-Hexanol                           | 111-27-3   | 865  | 867  | trace | 8.43  | 0.46 | 1.99  |
| 2-Methylbutyric acid                | 116-53-0   | 868  | 872  | 0.04  | -     | -    | -     |
| Isoamyl acetate                     | 123-92-2   | 874  | 875  | trace | 0.13  | 1.45 | 4.29  |
| 2-Methyl-1-butyl acetate            | 624-41-9   | 879  | 877  | -     | -     | 0.47 | 0.12  |
| 3-Heptanone                         | 106-35-4   | 885  | 884  | -     | -     | 0.41 | -     |
| Styrene                             | 100-42-5   | 889  | 886  | -     | -     | 0.76 | -     |
| 2-Heptanone                         | 110-43-0   | 890  | 888  | 16.08 | 0.49  | 0.76 | 1.53  |
| <i>n</i> -Nonane                    | 111-84-2   | 900  | 900  | -     | 0.39  | -    | -     |
| 2-Heptanol                          | 543-49-7   | 901  | 899  | -     | 0.21  | 0.15 | 0.40  |
| Heptanal                            | 111-71-7   | 902  | 902  | 0.34  | -     | -    | -     |
| 3-Hepten-1-ol                       | 2108-05-6  |      | 906  | -     | 2.72  | 0.33 | 0.58  |
| $\gamma$ -Butyrolactone.            | 96-48-0    | 914  | 915  | -     | -     | 0.32 | 0.72  |
| $\beta$ -Thujene                    | 2867-05-2  | 926  | 926  | -     | -     | 0.89 | -     |
| $\alpha$ -Pinene                    | 80-56-8    | 932  | 931  | 1.78  | trace | 2.06 | 2.39  |
| 3-Methyl-2-butenic acid?            | 541-47-9   | 934  |      | -     | 1.53  | -    | -     |
| Ethyl 2-methylvalerate (manzanate)  | 39255-32-8 | 940  | 940  | -     | -     | 1.23 | 1.59  |
| 3-Methylheptan-2-one?               | 2371-19-9  | 944  |      | -     |       | 1.62 | 1.19  |
| $\gamma$ -Butyrolactone. 2-methyl-  | 1679-47-6  | 953  | 951  | -     | -     | 0.05 | 0.10  |
| NN                                  | -          | 953  | -    | -     | -     | 0.15 |       |
| $\gamma$ -Valerolactone             | 108-29-2   | 955  | 954  | trace | -     | 0.16 | trace |
| Benzaldehyde                        | 100-52-7   | 958  | 960  | 2.62  | -     | -    | 0.11  |
| Isoamyl propionate                  | 105-68-0   | 966  | 968  | trace | 0.37  | 0.06 | 0.11  |
| $\beta$ -Pinene                     | 127-91-3   | 975  | 973  | 0.54  | 0.02  | 0.47 | trace |
| 3,5-Dimethyldihydro-2(3H)-furanone? | 5145-01-7  | 985  | -    | -     | 0.42  | 0.08 | -     |
| Phenol                              | 108-95-2   | 988  | 990  | 0.19  | -     | 0.58 | 0.61  |
| 2-Octanone                          | 111-13-7   | 992  | 991  | -     | 0.41  | 0.37 | 0.73  |
| 2-Pentylfuran                       | 3777-69-3  | 993  | 990  | 0.20  | -     | -    | -     |
| Hexanoic acid                       | 142-62-1   | 1000 | 998  | 1.43  | 0.30  | 0.76 | 0.75  |
| <i>n</i> -Decane                    | 124-18-5   | 1000 | 1000 | -     | trace | 0.31 | 0.48  |
| Ethyl hexanoate                     | 123-66-0   | 1003 | 1001 | trace | --    | -    | -     |
| Octanal                             | 124-13-0   | 1003 | 1003 | -     | 1.04  | -    | -     |
| 3-Carene                            | 13466-78-9 | 1009 | 1011 | 0.36  | trace | 0.28 | 0.32  |
| 3-Methylbutyl isobutanoate          | 589-59-3   | 1010 | 1006 | -     | 0.76  | 0.25 | 0.38  |
| ( <i>E</i> )-3-Hexenoic acid?       | 1577-18-0  | 1015 | -    | 0.68  | -     | -    | -     |
| <i>p</i> -Cymene                    | 99-87-6    | 1024 | 1024 | -     | -     | 0.24 | 0.28  |
| Limonene                            | 138-86-3   | 1029 | 1028 | 0.56  | 0.35  | 2.90 | 3.12  |
| 1,8-Cineol                          | 470-82-6   | 1032 | 1030 | 0.41  | -     | -    |       |
| 2-Ethyl-1-hexanol                   | 104-76-7   | 1032 | 1032 | -     | -     | 1.84 | 1.38  |
| Benzyl alcohol                      | 100-51-6   | 1040 | 1036 | -     | -     | -    | 0.24  |
| Salicyl aldehyde                    | 90-02-8    | 1043 | 1041 | 0.44  | -     | -    | -     |
| ( <i>Z</i> )- $\beta$ -Ocimene      | 3338-55-4  | 1045 | 1042 | 0.25  | -     | -    | -     |
| $\gamma$ -Caprolactone              | 695-06-7   | 1056 | 1056 | trace | -     | 1.71 | 2.56  |
| 1-Phenylethanol                     | 98-85-1    | 1062 | -    | -     | -     | 0.12 | 0.21  |
| 2-Acetylpyrrole                     | 1072-83-9  | 1064 | 1062 | trace | -     | -    | -     |

|                                     |            |      |      |       |       |      |       |
|-------------------------------------|------------|------|------|-------|-------|------|-------|
| Acetophenone                        | 98-86-2    | 1064 | 1066 | 0.33  | trace | 0.43 | 0.58  |
| (Z)-3-Octen-1-ol                    | 18409-17-1 | 1069 | 1067 | -     | 0.23  | -    | 0.75  |
| 1-Octanol                           | 111-87-5   | 1070 | 1072 | -     | 1.92  | -    | -     |
| Dihydromyrcenol                     | 18479-58-8 | 1073 | 1072 | -     | -     | 2.37 | 3.08  |
| 1-Nonen-3-ol                        | 21964-44-3 |      | 1080 | -     | 0.29  | -    | -     |
| <i>o</i> -Guaiacol                  | 90-05-1    | 1089 | 1091 | -     | -     | 0.52 | -     |
| 3-Nonanone                          | 925-78-0   |      | 1090 | -     | -     | 1.58 | 0.39  |
| 2-Nonanone                          | 821-55-6   | 1093 | 1089 | 1.99  | 1.57  | 6.61 | 10.94 |
| Methyl benzoate                     | 93-58-3    | 1095 | 1094 | 1.88  | -     | -    | -     |
| <i>n</i> -Undecane                  | 1120-21-4  | 1100 | 1100 | trace | trace | -    | -     |
| Tetrahydrolinalool?                 | 78-69-3    | 1097 | 1098 | -     | -     | 0.87 | -     |
| 2-Nonanol                           | 628-99-9   | 1103 | 1102 | -     | 0.57  | 5.79 | -     |
| Nonanal                             | 124-19-6   | 1105 | 1005 | 0.71  |       |      | -     |
| Isopentyl isovalerate (apple oil)   | 659-70-1   | 1106 | -    | -     | 1.83  | 0.45 | 0.83  |
| 2-Phenylethanol                     | 60-12-8    | 1112 | 1112 | -     | trace | 1.39 | 0.82  |
| Methyl octanoate                    | 111-11-5   | 1126 | 1126 | 0.96  | -     | -    | -     |
| NN                                  | -          | 1132 | -    | -     | -     | 0.29 | 0.28  |
| Camphor                             | 76-22-2    | 1144 | 1146 | -     | -     | 0.28 | 0.33  |
| $\gamma$ -Heptalactone              | 105-21-5   | 1155 | 1155 | -     | trace | 2.05 | 2.05  |
| 2-Methylundecane                    | 7045-71-8  | 1161 | 1164 | -     | -     | 0.08 | 0.14  |
| Borneol                             | 507-70-0   | 1166 | 1168 | -     | -     | 0.32 | 0.37  |
| 3-Methylundecane                    | 1002-43-3  | 1171 | 1172 | -     | -     | 0.13 | 0.12  |
| NN                                  | -          | 1175 | -    | -     | -     | 0.16 | -     |
| Octanoic acid                       | 124-07-2   | 1180 | 1182 | 20.72 | -     | 0.93 | 0.50  |
| Benzoic acid                        | 65-85-0    | 1183 | 1180 | -     | -     | 0.76 | -     |
| Isoamyl 3-methyl-2-butenate         | N/A        | 1185 |      | -     | 2.67  | 1.15 | 0.14  |
| $\alpha$ -Terpineol                 | 98-55-5    | 1191 | 1190 | -     | -     | 0.94 | 0.93  |
| Creosol ( <i>p</i> -methylguaiacol) | 93-51-6    | 1193 | 1192 | -     | -     | 1.22 | 1.29  |
| Ethyl octanoate                     | 106-32-1   | 1200 | 1198 | 10.57 | trace | -    | -     |
| <i>n</i> -Dodecane                  | 112-40-3   | 1200 | 1200 | -     | trace | 2.00 | 0.26  |
| Octyl acetate                       | 112-14-1   | 1213 | 1214 | trace | 0.50  | 0.14 | 0.61  |
| 3-Octenoic acid                     | 1577-19-1  | 1214 | -    | 0.50  | -     | 0.51 | -     |
| 2-Octenoic acid                     | 1871-67-6  | 1233 | 1245 | 0.50  | -     | 0.51 | 0.15  |
| Acetate                             |            | 1239 | -    | -     | -     | 0.49 | 1.46  |
| NN                                  |            | 1243 | -    | -     | -     | 0.91 | 0.56  |
| NN                                  |            | 1245 | -    | -     | -     | 0.22 | 0.09  |
| NN                                  |            | 1251 | -    | -     | -     | 0.27 | 0.25  |
| NN                                  |            | 1255 | -    | -     | -     | 0.66 | 0.49  |
| Octanolide ( $\gamma$ -octalactone) | 104-50-7   | 1259 | 1259 | 0.30  |       | 1.09 | 0.95  |
| (E2)-Decenal                        | 3913-81-3  | 1263 | 1262 | -     | -     | 0.30 | 0.23  |
| NN                                  | -          |      | 1265 | -     | -     | 0.17 | -     |
| (2E)-Decen-1-ol                     | 18409-18-2 | 1273 | 1271 | -     | -     | 0.55 | 0.79  |
| 1-Decanol                           | 112-30-1   | 1273 | 1274 | -     | -     | 0.17 | 0.28  |
| NN                                  | -          | 1278 | -    | -     | -     | 0.14 | -     |
| <i>p</i> -Ethylguaiacol             | 2785-89-9  | 1284 | 1280 | -     | -     | 0.37 | 0.37  |
| NN                                  | -          | 1284 | -    | -     | -     | 0.62 | 0.46  |

|                                                           |            |      |      |      |       |       |       |
|-----------------------------------------------------------|------------|------|------|------|-------|-------|-------|
| Bornyl acetate                                            | 76-49-3    | 1287 | 1286 | -    | -     | 0.64  | 0.38  |
| 3-Undecanone?                                             | 2216-87-7  | 1283 | 1290 |      | 0.23  | 0.11  | 0.09  |
| Cyclohexanol acetate, <i>cis</i> -2- <i>tert</i> -butyl-. | 20298-69-5 | 1295 | 1293 | -    | -     | 0.57  | 0.33  |
| 2-Undecanone                                              | 53452-70-3 | 1294 | 1295 | -    | -     | 0.57  | 0.76  |
| NN                                                        | -          |      | 1297 | -    | -     | 0.39  | -     |
| <i>n</i> -Tridecane                                       | 629-50-5   | 1300 | 1300 | 0.33 | 0.19  | 0.16  | 0.28  |
| 2-Undecanol                                               | 1653-30-1  | 1305 | 1303 | -    | -     | 0.42  | 0.40  |
| NN                                                        | -          | -    | 1314 | -    | -     | 0.08  | -     |
| Ester                                                     | -          | -    | 1325 | -    | -     | 0.12  | -     |
| $\gamma$ -Nonalactone                                     | 104-61-0   | 1362 | 1363 | -    | -     | 0.08  | -     |
| Decanoic acid + C15H24                                    | -          | 1377 | 1374 | -    | -     | 0.15  | 0.12  |
| Ester (70,57,71,43,83....213)                             | -          | 1396 |      | -    | -     | 0.08  | 0.23  |
| <i>n</i> -Tetradecane                                     | 629-59-4   | 1400 | 1400 | -    | -     | 0.10  | 0.11  |
| ( <i>E</i> )-Decenyl acetate                              | 2497-23-6  | 1406 | 1411 | -    | -     | 0.17  | 0.49  |
| $\beta$ -Caryophyllene                                    | 87-44-5    | 1418 | 1417 | -    | 0.21  | 0.06  | 0.17  |
| Isoamyl benzoate                                          | 94-46-2    | 1438 | 1437 | -    | 0.23  | 0.16  | 0.29  |
| Isoamyl octanoate                                         | 2035-99-6  | 1450 | 1448 | -    | trace | 0.08  | 0.08  |
| Geranyl acetone                                           | 3796-70-6  | 1454 | 1454 | -    | -     | trace | -     |
| 4,11-Dimethyltetradecanoate                               | 55045-12-0 | 1462 | 1462 | -    | 0.26  | 0.08  | -     |
| NN                                                        | -          | 1480 | -    | -    | -     | 0.07  | -     |
| NN                                                        | -          | 1483 | -    | -    | -     | 0.06  | -     |
| 1-Pentadecene                                             | 13360-61-7 | 1493 | 1492 | -    | 16.99 | 0.17  | 0.10  |
| <i>n</i> -Pentadecane                                     | 629-62-9   | 1500 | 1500 | -    | 0.49  | 1.44  | 1.36  |
| $\gamma$ -Cadinene                                        | N/A        | 1517 | 1513 | -    | -     | 0.07  | 0.11  |
| ( <i>E</i> )-Calamenene                                   | 73209-42-4 | 1524 | 1522 | -    | -     | 0.07  | 0.09  |
| 7-Hexadecene?                                             | N/A        | 1576 | 1579 | -    | -     | 0.06  | trace |
| Hexadecane                                                | 544-76-3   | 1600 | 1600 | -    | -     | 0.15  | 0.09  |
| NN                                                        | -          | 1662 | -    | -    | -     | 0.08  | -     |
| NN                                                        | -          | 1669 | -    | -    | -     | 0.18  |       |
| 8-Heptadecene?                                            | 54290-12-9 | 1678 | 1680 | -    | 0.30  | 3.18  | 0.09  |
| <i>n</i> -Heptadecane                                     | 629-78-7   | 1700 | 1700 | -    | 0.18  | 1.47  | 1.95  |
| NN                                                        | -          | 1721 | -    | -    | -     | 0.09  | -     |
| NN                                                        | -          | 1733 | -    | -    | -     | 0.06  | -     |
| NN                                                        | -          | 1738 | -    | -    | -     | 0.25  | -     |
| Ester (nonyl nonanoate?)                                  | -          | 1750 | -    | -    | -     | 0.06  | -     |
| Ester                                                     | -          | 1763 | -    | -    | -     | 0.18  | -     |
| Ester                                                     | -          | 1771 | -    | -    | -     | 0.12  | -     |
| Octadec-7-ene                                             | N/A        | 1774 | 1776 | -    | -     | 0.13  | -     |
| Ester                                                     | -          | 1783 | -    | -    | -     | 0.48  | -     |
| Ester                                                     | -          | 1801 | -    | -    | -     | 0.40  | -     |
| isopropyl tetradecanoate?                                 | 110-27-0   | 1828 | 1827 | -    | -     | 0.60  | 1.09  |
| Ester                                                     | -          | 1830 | -    | -    | -     | 0.14  | -     |
| 9-Nonadecene?                                             | 31035-07-1 | 1874 | 1877 | -    | 0.45  | 5.51  | 2.87  |
| Nonadecene, isomer                                        | -          | 1878 | -    | -    | 0.10  | 0.16  | -     |
| <i>n</i> -Nonadecane                                      | 629-92-5   | 1900 | 1900 | -    | -     | 0.21  | 0.09  |

**Table S2.** Relative chemical composition (% TIC) of ether extracts from dry preparation of bee venom (Dv-1 & Dv-2) and fresh venom (Fv-1 & Fv-2) of honey bees

| Compound                                 | CAS        | RI <sup>Calc</sup> | RI <sup>Lit</sup> | Dry venom |      | Fresh venom |      |
|------------------------------------------|------------|--------------------|-------------------|-----------|------|-------------|------|
|                                          |            |                    |                   | Dv-1      | Dv-2 | Fv-1        | Fv-2 |
| Isobutyric acid, TMS                     | 16844-98-7 | 831                | 832               | -         | -    | 0.05        | -    |
| 3-Methylbutyric acid, TMS                | 55557-13-6 | 932                | 932               | -         | -    | 0.93        | 0.16 |
| Ethyl amine, di-TMS                      | 2477-39-6  | 966                | 966               | -         | 8.44 | 1.07        | 2.57 |
| Carbodiimide, TMS                        | 1000-70-0  | 968                | 966               | 0.52      | 1.23 | -           | -    |
| Boric acid, tri-TMS                      | 4325-85-3  | 1001               | 1002              | -         | -    | 0.30        | -    |
| 3-Methyl-3-butenoid acid,TMS             | 25436-25-3 | 1007               | 1008              | 0.06      | -    | -           | 0.47 |
| 1,2-Propanediol, di-TMS                  | 17887-27-3 | 1009               | 1010              | -         | -    | 0.03        | -    |
| Crotonic acid, TMS                       | 25436-25-3 | 1013               | 1012              | -         | 0.06 | 0.43        | -    |
| 2,3-Butanediol, di-TMS, isomer 1         | 53274-85-4 | 1043               | 1043              | -         | -    | 0.23        | -    |
| 2,3-Butanediol, di-TMS, isomer 2         | N/A        | 1050               | 1049              | -         | -    | 0.47        | -    |
| Phenol, TMS                              | 1529-17-5  | 1054               | 1055              | -         | -    | 0.03        | -    |
| 1,3-Propanediol, di-TMS?                 | 17887-80-8 | 1059               | 1050              | -         | -    | 0.04        | -    |
| Lactic acid, di-TMS                      | 17596-96-2 | 1074               | 1073              | 0.05      | 0.05 | 0.48        | -    |
| Benzyl alcohol, TMS                      | 14642-79-6 | 1156               | 1156              | -         | -    | 0.05        | -    |
| $\alpha$ -Hydroxyisovaleric acid, di-TMS | 55124-92-0 | 1178               | 1175              | -         | -    | 0.07        | -    |
| 1-Octanol                                | 14246-16-3 | 1182               | 1184              | -         | -    | 0.03        | 0.03 |
| 2,5-Hexanediol, di-TMS?                  | 66956-94-3 | 1217               | -                 | -         | -    | 0.07        | -    |
| 3-Hydroxyisovaleric acid, di-TMS         | 55124-90-8 | 1219               | 1216              | -         | -    | 0.05        | -    |
| 2-Phenylethanol, TMS                     | 14629-58-4 | 1228               | 1228              | -         | -    | trace       | -    |
| Benzoic acid, TMS                        | 2078-12-8  | 1248               | 1249              | -         | -    | -           | 0.30 |
| 2-Hydroxy-3-methylvaleric acid, di-TMS   | 54890-09-4 | 1254               | 1253              | -         | -    | 0.13        | -    |
| Octanoic acid, TMS                       | 55494-06-9 | 1269               | 1266              | -         | -    | 0.10        | 0.03 |
| H <sub>3</sub> PO <sub>4</sub> , tri-TMS | 10497-05-9 | 1285               | 1289              | 0.44      | 0.99 | -           | -    |
| Glycerol, tri-TMS                        | 6787-10-6  | 1289               | 1293              | 0.36      | 0.13 | 0.07        | -    |
| Benzeneacetic acid, TMS                  | 2078-18-4  | 1301               | 1303              | -         | -    | 0.04        | 0.01 |

|                                |             |      |      |      |       |       |      |
|--------------------------------|-------------|------|------|------|-------|-------|------|
| Thymol, TMS                    | 55012-80-1  | 1318 | 1321 | -    | -     | 0.04  | -    |
| 2-Octenoic acid, TMS?          | N/A         | 1321 | 1313 | -    | -     | 0.08  | 0.02 |
| Succinic acid, di-TMS          | 40309-57-7  | 1325 | 1324 | -    | trace | 0.06  | -    |
| Uracil, di-TMS                 | 10457-14-4  | 1351 | 1354 | -    | -     | 0.04  | -    |
| Nonanoic acid, TMS             | 82326-11-2  | 1366 | 1366 | -    | trace | -     | -    |
| Citronellic acid, TMS?         | N/A         | 1394 | -    | -    | -     | 0.16  | -    |
| NN                             | -           | 1410 | -    | -    | -     | 0.05  | -    |
| NN                             | -           | 141  | -    | -    | -     | 0.24  | -    |
| NN                             | -           | 1463 | -    | -    | -     | 0.15  | -    |
| 3-Hydroxyoctanoic acid, di-TMS | 136788-83-5 | 1488 | 1488 | -    | -     | 0.03  | -    |
| 1-Pentadecene                  | 13360-61-7  | 1492 | 1492 | -    | -     | -     | 0.08 |
| Pyroglutamic acid, di-TMS      | 30274-77-2  | 1533 | 1530 | -    | 0.06  | -     | -    |
| Tetrose, TMS?                  | N/A         | 1585 | -    | 0.10 | -     | -     | -    |
| 4-Hydroxybenzoic acid, di-TMS  | 2078-13-9   | 1632 | 1636 | -    | -     | 0.28  | 0.22 |
| 2-Hydroxydecanoic acid, di-TMS | N/A         | 1653 | 1651 | -    | -     | 0.02  | -    |
| 8-Heptadecene?                 | 2579-04-6   | 1675 | -    | -    | -     | -     | 0.01 |
| n-Heptadecane                  | 629-78-7    | 1700 | 1700 | -    | -     | trace | -    |
| Suberic acid, di-TMS           | 43199-48-0  | 1707 | 1711 | -    | -     | 0.12  | -    |
| NN                             | -           | 1715 | -    | -    | -     | 0.09  | -    |
| Vanillic acid, di-TMS          | 2078-15-1   | 1773 | 1776 | -    | -     | 0.09  | -    |
| (E,Z)-Farnesol, TMS            | N/A         | 1813 | -    | -    | -     | 0.05  | -    |
| Hexafuranose, TMS              | -           | 1802 | -    | 0.12 | -     | -     | -    |
| Neophytadiene 1                | N/A         | 1841 | 1840 | 0.05 | -     | -     | -    |
| Tetradecanoic acid, TMS        | 18603-17-3  | 1852 | 1853 | -    | -     | 0.13  | -    |
| Citric acid, TMS               | 14330-97-3  | 1855 | 1852 | 1.88 | 3.79  | -     | -    |
| 9-Nonadecene                   | 31035-07-1  | 1876 | 1880 | 0.13 | 0.10  | 0.78  | 0.55 |
| n-Nonadecane                   | 629-92-5    | 1902 | 1900 | 0.20 | 0.15  | -     | 0.03 |
| Sebacic acid, di-TMS           | 18408-42-9  | 1905 | 1906 | -    | -     | 0.45  | -    |
| Vanillypropionic acid, di-TMS  | 56051-49-1  | 1907 | 1908 | -    | -     | -     | 0.05 |
| Pentadecanoic acid, TMS        | 74367-22-9  | 1954 | 1954 | -    | -     | -     | 0.01 |

|                                |            |      |      |       |       |       |       |
|--------------------------------|------------|------|------|-------|-------|-------|-------|
| Indole-3-acetic acid, di-TMS   | 56114-66-0 | 1972 | 1977 | -     | -     | 0.06  | -     |
| Gallic acid, TMS               | 2078-17-3  | 1986 | 1985 | 1.52  | 0.88  | -     | -     |
| (Z)-9-Hexadecenoic acid, TMS?  | N/A        | 2025 | -    | -     | -     | 0.32  | -     |
| Palmitelaidic acid, TMS        | 82326-15-6 | 2028 | 2030 | -     | -     | 0.39  | 0.09  |
| $\beta$ -Glucopyranose, TMS    | 3327-61-5  | 2031 | 2032 | 0.04  | -     | -     | -     |
| Hexadecanoic acid, TMS         | 55520-89-3 | 2053 | 2052 | 0.34  | 0.29  | 2.40  | 4.93  |
| (Z)-9-Heneicosene              | 39836-21-0 | 2074 | 2071 | 0.05  | trace | -     | 0.01  |
| n-Heneicosane                  | 629-94-7   | 2100 | 2100 | 0.39  | 0.32  | 0.12  | 0.17  |
| (Z)-10-Heptadecenoic acid, TMS | N/A        | 2126 | -    | -     | -     | 0.10  | 0.01  |
| Oleyl alcohol, TMS             | 78695-25-7 | 2137 | 2136 | 0.10  | 0.09  | 0.29  | 0.23  |
| Heptadecanoic acid, TMS        | 55517-58-3 | 2150 | 2149 | -     | -     | -     | 0.04  |
| 1-Octadecanol, TMS             | 18748-98-6 | 2164 | 2164 | 0.08  | 0.06  | 0.27  | 0.12  |
| NN                             | -          | 2199 | -    | -     | -     | 0.23  | -     |
| n-Docosane                     | 629-97-0   | 2200 | 2200 | 0.07  | 0.06  | -     | 0.03  |
| NN                             | -          | 2211 | -    | -     | -     | 0.18  | -     |
| Linoleic acid, TMS             | 56259-07-5 | 2215 | 2215 | 0.04  | trace | 2.12  | 1.94  |
| Oleic acid, TMS                | 21556-26-3 | 2222 | 2222 | 0.80  | 0.65  | 12.15 | 20.14 |
| Octadecanoic acid              | 18748-91-9 | 2250 | 2250 | 0.06  | 0.06  | 3.18  | 2.76  |
| NN                             | -          | 2264 | -    | -     | -     | -     | 0.22  |
| (Z)-9-Tricosene                | 27519-02-4 | 2274 | 2274 | 0.42  | 0.36  | 0.20  | 0.16  |
| 7-Tricosene                    | N/A        | 2280 | 2279 | -     | -     | -     | 0.02  |
| n-Tricosane                    | 638-67-5   | 2300 | 2300 | 2.15  | 1.70  | 0.95  | 1.55  |
| (10Z)-Nonadecenoic acid, TMS?  | N/A        | 2318 | -    | -     | -     | 0.06  | -     |
| (9Z)-Eicosen-1-ol, TMS         | N/A        | 2337 | -    | 14.75 | 11.71 | 12.40 | 16.16 |
| 10-Eicosen-1-ol, TMS?          | N/A        | 2342 | -    | 0.17  | 0.12  | -     | 0.30  |
| Nonadecanoic acid, TMS         | 74367-35-4 | 2349 | 2352 | -     | -     | 0.10  | -     |
| 1-Eicosanol, TMS               | N/A        | 2361 | 2360 | 0.06  | 0.16  | 0.87  | 0.39  |
| NN (43,55,82,96, 81,278...)    | -          | 2385 | -    | 1.30  | 1.04  | 0.16  | 0.2   |
| n-Tetracosane                  | 646-31-1   | 2400 | 2400 | 0.17  | 0.13  | trace | 0.44  |

|                                |            |      |      |       |       |      |      |
|--------------------------------|------------|------|------|-------|-------|------|------|
| 11,14-Eicosadienoic acid, TMS? | N/A        | 2414 | -    | -     | -     | 0.06 | -    |
| 11-Eicosenoic acid, TMS?       | N/A        | 2420 | -    | -     | -     | 0.90 | 0.28 |
| (Z13)_Eicosenoic acid, TMS?    | N/A        | 2422 | -    | -     | -     | -    | 0.29 |
| Eicosanoic acid, TMS           | 55530-70-6 | 2447 | 2447 | -     | -     | 0.26 | 0.29 |
| 9-Pentacosene                  | N/A        | 2475 | 2471 | 0.67  | 0.51  | 0.65 | 0.38 |
| 7-Pentacosene                  | N/A        | 2482 | -    | 0.09  | 0.04  | 0.12 | -    |
| n-Pentacosane                  | 629-99-2   | 2503 | 2500 | 3.41  | 2.63  | 2.16 | 1.75 |
| 1-O-Hexadecylglycerol, di-TMS  | N/A        | 2507 | -    | 0.09  | 0.07  | -    |      |
| 12-Docosenol, TMS?             | N/A        | 2532 | -    | 0.20  | 0.15  | 0.46 | 0.24 |
| 11-Methylpentacosane           | 15689-71-1 | 2530 | 2529 | -     | 0.06  | -    | 0.18 |
| 1-Docosanol, TMS               | 42449-18-3 | 2558 | 2557 | 0.06  | -     | 0.33 | 0.57 |
| NN                             | -          | 2562 | -    | -     | -     | 0.05 | -    |
| NN (57...337...)               | -          | 2574 | -    | 0.07  | -     | -    | -    |
| n-Hexacosane                   | 630-01-3   | 2600 | 2600 | 0.20  | 0.17  | 0.20 | 0.57 |
| NN                             | -          | 2634 | -    | -     | -     | 0.06 | -    |
| Docosanoic acid, TMS           | 74367-36-5 | 2645 | 2646 | -     | -     | 0.38 | 0.21 |
| 2-Methylhexacosane             | N/A        | 2661 | 2663 | -     | -     | 0.05 | -    |
| 9-Heptacosene                  | N/A        | 2676 | -    | 0.38  | 0.29  | 0.50 | 0.20 |
| 7-Heptacosene                  | N/A        | 2680 | 2682 | trace | 0.08  | 0.18 | -    |
| n-Heptacosane                  | 593-49-7   | 2702 | 2700 | 11.09 | 8.55  | 3.55 | 3.39 |
| Sucrose, TMS                   | 19159-25-2 | 2717 | 2714 | 0.16  | 0.31  | -    | -    |
| 13-Methylheptacosane           | 15689-72-2 | 2732 | 2731 | 0.45  | 0.34  | 0.21 | 0.89 |
| NN                             |            | 2744 | -    | -     | -     | 0.10 | 0.22 |
| 1-Tetracosanol, TMS            | N/A        | 2755 | 2754 | 0.19  | 0.16  | 0.47 | 0.35 |
| n-Octacosane                   | 630-02-4   | 2800 | 2800 | 0.16  | 0.13  | 0.26 | 0.18 |
| Trehalose, octa-TMS            | N/A        | 2816 | 2815 | -     | 0.08  | -    | -    |
| Squalene                       | 111-02-4   | 2829 | 2828 | 0.10  | trace | 0.07 | 0.38 |
| Tetracosanoic acid             | 74367-37-6 | 2844 | 2845 | -     | -     | 1.24 | 0.18 |
| 2-Methyloctacosane             | 1560-98-1  | 2861 | 2861 | -     | -     | 0.09 | -    |



|                                      |              |      |      |      |      |       |       |
|--------------------------------------|--------------|------|------|------|------|-------|-------|
| Glyceride (205,73,147,117,57...501?) | -            | 2871 | -    | 1.86 | 1.43 | -     | -     |
| 9-Nonacosene                         | N/A          | 2875 | 2875 | 0.15 | 0.22 | 0.48  | 0.14  |
| 7-Nonacosene                         | N/A          | 2882 | 2882 | 1.22 | 0.94 | 0.76  | 0.18  |
| 1-Eicosylglycerol, di-TMS            | N/A          | 2896 | 2892 | 3.16 | 2.43 | 0.95  | 0.58  |
| n-Nonacosane                         | 630-03-5     | 2904 | 2900 | 3.28 | 2.46 | 3.35  | 2.31  |
| δ-Tocopherol, TMS                    | 52704-11-7   | 2913 | 2915 | 0.09 | -    | -     | -     |
| NN                                   | -            | 2933 |      | 0.34 | 0.19 | 0.32  | -     |
| 1-Hexacosanol, TMS                   | 391679-86-0  | 2952 | 2951 | 0.23 | 0.17 | 0.37  | 0.33  |
| n-Triacontane                        | 638-68-6     | 3000 | 3000 | 0.12 | 0.09 | 0.13  | 0.08  |
| NN                                   | -            | 3055 | -    | 0.37 | 0.30 | 0.12  | 0.28  |
| NN (55...432)                        | -            | 3061 | -    | 0.48 | 0.39 | 1.08  | -     |
| NN (55....)                          | -            | 3070 | -    | 0.47 | 0.37 | 0.58  | 0.46  |
| 9-Hentriacontene                     | N/A          | 3078 | 3078 | 4.42 | 3.46 | 3.28  | 2.45  |
| 7-Hentriacontene,                    | N/A          | 3085 | 3082 | 3.34 | 2.62 | 2.40  | 2.30  |
| n-Hentriacontane                     | 638-68-6     | 3103 | 3100 | 2.23 | 1.76 | 2.40  | 2.31  |
| Kaempherol, tetra-TMS                | N/A          | 3113 | 3114 | -    | -    | 0.14  | -     |
| 13-Methyltriacontane                 | N/A          | 3130 | 3132 | -    | 0.13 | -     | 0.55  |
| 1-Octacosanol, TMS                   | 959269-04-6  | 3149 | 3148 | -    | -    | -     | 0.29  |
| NN (82...502)                        | -            | 3153 |      | 0.69 | 0.61 | -     | -     |
| 9-Dotriacontene                      | N/A          | 3175 | 3175 | -    | 0.16 | -     | 0.26  |
| n-Dotriacontane                      | 544-85-4     | 3200 | 3200 | -    | -    | trace | 0.03  |
| Octacosanoic acid, TMS               | 1206693-36-8 | 3244 | 3241 | -    | -    | 0.60  | -     |
| 24-Methylenecholesterol, TMS?        | N/A          | 3252 | 3244 | -    | -    | 1.94  | 3.36  |
| NN                                   | -            | 3255 | -    | -    | 1.10 | -     | 1.43  |
| Tritriacontadiene C33H64?            | -            | 3257 | -    | 1.34 | -    | 2.46  | 2.41  |
| 9-Tritriacontene                     | N/A          | 3273 |      | 1.13 | 0.45 | 0.58  | 4.77  |
| 7-Tritriacontene                     | N/A          | 3282 | -    | 9.20 | 0.89 | 3.70  | trace |
| Triacontene, isomer                  | -            | 3286 | -    | 0.63 | 0.46 | -     | -     |
| n-Tritriacontane                     | 630-05-7     | 330  | 3300 | 0.41 | 0.30 | 0.33  | 0.34  |

|                                               |              |      |       |       |       |      |      |
|-----------------------------------------------|--------------|------|-------|-------|-------|------|------|
| Ellagic acid, TMS                             | N/A          | 3330 | 3328  | 0.24  | 0.17  | -    | -    |
| $\beta$ -Sitosterol, TMS                      | 2625-46-9    | 3346 | 3345  | -     | -     | -    | 1.29 |
| 1-Triacontanol, TMS                           | N/A          | 3347 | 3347  | 0.51  | 0.40  | 1.05 | -    |
| NN (aldehyde?)                                | -            | 3350 | -     | -     | 0.33  | 0.42 | -    |
| Avenasterol, TMS                              | 55527-94-1   | 3365 | 3360  | 0.23  | 0.10  | 0.94 | 1.65 |
| 5 $\alpha$ -Stigmast-7-en-3 $\beta$ -ol, TMS? | N/A          | 3406 | -     | -     | -     | 0.04 | 0.21 |
| NN                                            | -            | 3420 | -     | -     | -     | 0.08 | -    |
| Triacontanoic acid, TMS                       | 1206693-37-9 | 3440 | 3440  | -     | -     | 0.65 | 0.04 |
| NN (96,82,55,83...488)                        | -            | 3452 | -     | -     | 0.14  | 0.65 | 0.22 |
| NN                                            | -            | 3463 | -     | -     | -     | 0.15 | 0.27 |
| NN                                            | -            | 3470 | -     | -     | -     | 0.08 | -    |
| 9-Pentatriacontene                            | -            | 3474 | -     | -     | 0.14  | -    | 0.26 |
| 7-Pentatriacontene                            | -            | 3477 | -     | -     | 0.08  | -    | 0.18 |
| 1-Dotriacontanol, TMS                         | N/A          | 3545 | 3542  | 0.20  | 0.18  | 0.40 | 0.23 |
| Aldehyde?                                     | -            | 3550 | -     | 0.28  | 0.24  | -    | --   |
| Ester (palmitate)                             | -            |      | -     | 2.59  |       | -    | -    |
| Unsaturated acid, TMS C35H70O2Si              | -            | 3622 | -     | -     | -     | 0.04 | -    |
| Dotriacontanoic acid, TMS                     | N/A          | 3640 | -3641 | -     | -     | 0.30 | -    |
| Alkene C37H72?                                | -            | 3737 | -     | -     | -     | 0.10 | -    |
| 1-Tetratriacontanol, TMS                      | N/A          | 3743 | 3743  | -     | -     | 0.09 | -    |
| Stearyl linoleate?                            | N/A          | 3753 | -     | -     | 2.67  | 0.62 | 0.22 |
| Eicosyl palmitate                             | 22413-01-0   | 3770 | -     | -     | -     | 0.14 | -    |
| Unsaturated acid, TMS C37H74O2Si              | -            | 3823 | -     | -     | -     | 0.04 | -    |
| Tetratriacontanoic acid, TMS                  | N/A          | 3840 | 3838  | -     | -     | 0.38 | -    |
| Ester (oleate)                                | -            | 3937 | -     | 13.18 | 17.42 | 1.89 | 1.37 |
| Ester (oleate)                                | -            | 3954 |       | 1.54  | 1.51  | 0.92 | 0.56 |
| Hexatriacontanoic acid, TMS                   | N/A          | 4040 | -     | -     | -     | 0.06 | -    |
| Tetracosyl palmitate                          | N/A          | 4173 | -     | -     | 0.39  | 3.42 | 1.20 |

**Table S3.** Chemical composition of methanol extracts of dried bee venom (Dv-1 and Dv-22) and the fresh honey bee venom (Fv-1 and Fv-2)

| Compounds                                  | CAS        | RI <sup>Calc</sup> | RI <sup>Lit</sup> | Dry venom |       | Fresh venom |       |
|--------------------------------------------|------------|--------------------|-------------------|-----------|-------|-------------|-------|
|                                            |            |                    |                   | Dv-1      | Dv-2  | Fv-1        | Fv-2  |
| Isovaleric acid, di-TMS                    | 55557-13-6 | 932                | 932               | -         | -     | -           | 0.02  |
| Alanine, mono-OTMS                         | N/A        | 933                | -                 | -         | -     | 0.21        | 0.18  |
| Ethylamine, di-TMS                         | 2477-33-6  | 964                | 959               | -         | 1.75  | 0.88        | 1.52  |
| Glycine, methyl ester, mono-TMS            | 25688-7-6  | 966                | 971               | -         | 0.04  | -           | -     |
| Carbodiimide, di-TMS                       | 1000-70-0  | 966                | 965               | 0.30      | 0.17  | 0.49        | 0.60  |
| Ethylene glycol, di-TMS                    | 7381-30-8  | 991                | 993               | -         | 0.08  | trace       | 0.08  |
| 3,3-Dimethylacrylic acid, TMS              | 25436-25-3 | 1007               | -                 | -         | -     | -           | 0.13  |
| 3-Methyl-3-butenic acid, TMS               | 25436-25-3 | 1008               | -                 | 0.10      | 0.10  | -           | -     |
| 1,2-Propanediol, di-TMS                    | 17887-27-3 | 1009               | 1010              | -         | -     | -0.05       | -     |
| Ethanolamine, N,O-di-TMS                   | 17165-52-5 | 1021               | -                 | -         | -     | 0.06        | trace |
| 3-Methylpyridine, mono-TMS                 | 41571-88-4 | 1036               | -                 | -         | 0.02  | -           | 0.50  |
| Carbamate, tri-TMS                         | N/A        | 1040               | -                 | -         | -     | -           | 0,15  |
| 2,3-Butanediol, di-TMS, isomer-1           | 53274-85-4 | 1043               | 1043              | -         | -     | 0.11        | 0.07  |
| 2,3-Butanediol, di-TMS, isomer-2           | 53274-85-4 | 1050               | 1049              | -         | -     | 0.33        | 0.07  |
| Phenol, mono-TMS                           | 1529-17-5  | 1054               | 1055              | -         | -     | -           | -     |
| 1,3-Propanediol, di-TMS?                   | 17887-80-8 | 1059               | 1050              | -         | -     | 0.08        | -     |
| Lactic acid, di-TMS                        | 17596-96-2 | 1071               | 1073              | 0.49      | 0.22  | 4.00        | 0.38  |
| Glycolic acid, tri-TMS                     | 33581-77-0 | 1082               | 1083              | 0.11      | 0.05  | -           | 0.10  |
| Alanine, N,O-di-TMS                        | 2899-44-7  | 1112               | 1114              | 0.91      | 0.07  | 3.52        | 2.62  |
| Glycine, N,O-di-TMS                        | 7364-42-3  | 1128               | 1128              | -         | --    | 0.60        | 0.44  |
| Sarcosine, N,O-di-TMS                      | 7364-43-4  | 1151               | 1150              | -         | -     | 0.49        | 0.27  |
| $\beta$ -Lactic acid, di-TMS               | 55162-32-8 | 1157               | 1155              | -         | -     | 0.11        | 0.20  |
| Benzyl alcohol, TMS                        | 14642-79-6 | 1156               | 1156              | -         | trace | -           | -     |
| 3-Hydroxybutyric acid, di-TMS              | 55133-94-3 | 1167               | 1167              | -         | -     | 0.06        | trace |
| Proline, mono-OTMS                         | N/A        | 1173               | 1174              | -         | -     | -           | 0.10  |
| $\alpha$ -Hydroxyisovaleric acid, di-TMS   | 55124-92-0 | 1178               | 1175              | -         | -     | 0.10        | -     |
| 1-Octanol, mono-TMS                        | 14246-16-3 | 1182               | 1184              | -         | -     | -           | -     |
| Methylphosphoric acid, di-TMS              | 18291-81-1 | 1190               | 1190              | -         | -     | trace       | trace |
| $\beta$ -Alanine, N,O-di-TMS               | 1789-86-0  | 1199               | 1198              | -         | -     | 0.51        | 0.28  |
| 2,5-Hexanediol, di-TMS?                    | 66956-94-3 | 1217               | -                 | -         | -     | -           | -     |
| 3-Hydroxyisovaleric acid, di-TMS           | 55142-90-8 | 1220               | 1220              | 0.30      | 0.04  | 0.12        | 0.24  |
| Valine, N,O-di-TMS                         | 7364-44-5  | 1228               | 1227              | trace     | 0.02  | 1.85        | 0.87  |
| Benzoic acid, mono-TMS                     | 2078-12-8  | 1250               | 1248              | trace     | 0.05  | 0.09        | 0.08  |
| 4-Methylpentanoic acid, 2-hydroxy-, di-TMS | 54890-08-3 | 1250               | 1252              | 0.10      | 0.06  | 0.09        | -     |
| 3-Methylpentanoic acid, 2-hydroxy-, di-TMS | 54890-09-4 | 1253               | 1253              | -         | 0.04  | 0.05        | -     |
| Urea, di-TMS                               | 18297-63-7 | 1254               | 1254              | -         | 0.04  | 0.15        |       |
| Ethanolamine, N,N,O-tri-TMS                | 5630-81-9  | 1278               | 1275              | 0.12      | 0.18  | 0.34        | 0.33  |
| Leucine, N,O-di-TMS                        | 15984-97-1 | 1287               | 1284              | trace     | 0.02  | 2.87        | 1.00  |
| H <sub>3</sub> PO <sub>4</sub> , tri-TMS   | 10497-05-9 | 1290               | 1289              | 11.54     | 6.89  | 2.48        | 5.13  |
| Glycerol, tri-TMS                          | 6787-10-6  | 1294               | 1293              | 0.42      | 1.15  | 2.55        | 2.24  |
| Proline, di-TMS                            | 7364-47-8  | 1307               | 1303              | 0.77      | 0.45  | 4.30        | 4.88  |
| Glycine, tri-TMS                           | 5630-82-0  | 1318               | 1314              | 0.14      | 0.04  | 0.52        | 0.32  |

|                                                          |              |      |      |       |       |       |       |
|----------------------------------------------------------|--------------|------|------|-------|-------|-------|-------|
| Thymol, mono-TMS                                         | 55012-80-1   | 1318 | 1321 | -     | -     | -     | -     |
| 2-Octenoic acid, mono-TMS?                               | N/A          | 1321 | 1313 | -     | -     | -     | -     |
| 1-Amino-2-propanol, tri-TMS                              | N/A          | 1324 | 1324 | trace | 0.06  | -     | -     |
| Succinic acid, di-TMS                                    | 40309-57-7   | 1326 | 1324 | 0.67  | 0.16  | 1.04  | 0.52  |
| Glyceric acid, tri-TMS                                   | 38191-87-6   | 1352 | 1348 | 0.62  | 0.04  | -     | -     |
| Uracil, di-TMS                                           | 10457-14-4   | 1353 | 1354 | -     | -     | 0.40  | 0.43  |
| Itaconic acid, di-TMS                                    | 55495-04-7   | 1355 | 1358 | trace | 0.03  | 0.04  | trace |
| Fumaric acid, di-TMS                                     | 17962-03-7   | 1357 | 1357 | -     | 0.08  | -     | -     |
| NN (174,73,248,147,175)                                  | -            | 1365 | -    | 0.21  | 0.34  | -     | 0.11  |
| Pipecolic acid, TMS                                      | 55255-44-2   | 1365 | 1366 | -     | -     | trace | trace |
| Serine, N,O,O-tri-TMS                                    | 64625-17-8   | 1380 | 1374 | trace | 0.02  | 0.99  | 0.66  |
| Threonine, tri-TMS                                       | 64569-35-3   | 1405 | 1406 | -     | -     | 1.10  | 0.60  |
| Hydroquinone, di-TMS                                     | 2117-24-0    | 1410 | 1410 | -     | 0.03  | --    | -     |
| Citronellic (3,6-dimethyl-6-octenoic) acid?, TMS         | N/A          | 1394 | -    | -     | -     | -     | -     |
| 2,4-Dihydroxybutanoic acid, tri-TMS                      | 55191-52-1   | 1435 | 1432 | trace | -     | -     | -     |
| $\beta$ -Alanine, N,N,O-tri-TMS                          | 55255-77-1   | 1440 | 1438 | 0.10  | 0.15  | 1.08  | 0.65  |
| NN (174,73,147,175,248)                                  | -            | 1454 | -    | -     | 0.06  | -     | -     |
| NN (73,273,147,182)                                      | -            | 1460 | -    | -     | 0.03  | -     | -     |
| 3,4-Dihydroxybutanoic acid, tri-TMS                      | 55191-53-2   | 1457 | 1455 | 0.32  | -     | -     | -     |
| NN                                                       |              | 1460 | -    | -     | 0.03  | -     | 0.13  |
| Homoserine, N,O,O-tri-TMS                                | 1177129-58-6 | 1463 | 1461 | -     | -     | 0.18  | trace |
| 2-Aminomalonic acid, tri-TMS                             | 959080-51-4  | 1489 | 1479 | -     | -     | -     | trace |
| Malic acid                                               | 38166-11-9   | 1512 | 1510 | 0.34  | 0.23  | 0.14  | 0.24  |
| Adipic acid, di                                          | 18105-31-2   | 1517 | 1517 | -     | -     | 0.20  | trace |
| Pentonic acid, 2-deoxy-3,5-dihydroxy-, $\gamma$ -lactone | 74742-34-0   | 1522 | 1518 | 0.21  | -     | -     | -     |
| 5-Oxoproline                                             | 30274-77-2   | 1535 | 1533 | 2.05  | -     | 0.10  | 1.28  |
| Threitol                                                 | 32381-52-5   | 1534 | 1535 | -     | 0.04  | 0.52  | 0.24  |
| 4-Aminobutyric acid (GABA)                               | 39508-23-1   | 1540 | 1541 | -     | -     | trace | 0.27  |
| Hydroxyproline                                           | 55429-66-8   | 1542 | 1543 | -     | -     | 0.09  | 0.92  |
| Aspartic acid, N,N,O-tri-TMS                             | 55268-53-6   | 1544 | 1537 | trace | -     | --    | -     |
| 5-Methylcytosine, N,O-di-TMS                             | 32865-88-6   | 1547 | 1542 | trace | -     | -     | -     |
| GABA (4-aminobutyric acid), N,O-di-TMS                   | 39508-23-1   | 1544 | 1541 | -     | trace | -     | -     |
| Phenylalanine, mono-OTMS                                 | 2899-42-5    | 1547 | 1547 | -     | -     | -     | 0.21  |
| Cysteine, N,O,S-tri-TMS                                  | 7364-50-3    | 1547 | 1548 | -     | trace | -     | -     |
| NN (73,174,147,175,292)                                  | -            | 1577 | -    | -     | 0.06  | -     | -     |
| Threonic acid, tetra-TMS                                 | N/A          | 1577 | 1575 | 0.16  | -     | -     | -     |
| $\alpha$ -Hydroxyglutaric acid                           | 55530-62-6   | 1589 | 1588 | -     | -     | -0.37 | 0.09  |
| $\beta$ -Phenyllactic acid, di-TMS                       | 27750-45-4   | 1593 | 1596 | -     | -     | 0.12  | -     |
| Erythronic acid, tetra-TMS                               | 38191-88-7   | 1595 | 1597 | 0.14  | 0.04  | -     | trace |
| Histamine, N,N'-di-TMS                                   | N/A          | 1624 | 1616 | -     | 0.28  | -     | -     |
| 4-Hydroxybenzoic acid, di-TMS                            | 2078-13-9    | 1636 | 1636 | 0.12  | 0.11  | -     | 0.27  |
| 5-Aminovaleric acid, tri-TMS                             | 55191-54-3   | 1637 | 1639 | -     | -     | -     | 0.27  |
| Glutamine, N,O,O-tri-TMS                                 | 15985-07-6   | 1643 | 1642 | trace | 0.10  | 1.90  | 1.65  |
| Arabinoic acid                                           | 32384-55-7   | 1649 | 1650 | -     | -     | -     | 0.18  |
| NN (240,73,170,97,70)                                    | -            | 1652 | -    | 0.49  | 0.06  | -     | -     |
| NN (N-acetylputrescine like), TMS                        | -            | 1657 | -    | -     | 0.11  | -     | -     |

|                                     |              |      |      |       |       |       |       |
|-------------------------------------|--------------|------|------|-------|-------|-------|-------|
| Homocysteine, N,O,S-tri-TMS         | N/A          | 1679 | 1676 | -     | -     | -     | 0.19  |
| 2-Deoxyribonic acid, tetra-TMS      | N/A          | 1682 | 1682 | -     | -     | 0.11  | -     |
| Suberic acid, di-TMS                | 43199-48-0   | 1707 | 1711 | -     | -     | trace | -     |
| NN                                  | -            | 1710 |      | -     | -     | 0.12  | 0.35  |
| NN (73,147,103,246,318)             | -            | 1717 | -    | -     | 0.01  | 0.09  | -     |
| Isocitric lactone, di-TMS           | 65143-62-6   | 1718 | 1713 | -     | 0.02  | -     | -     |
| Pentitol, penta-TMS                 | -            | 1732 |      | -     | -     | 0.11  | 0.18  |
| <i>n</i> -Heptadecane               | 629-78-7     | 1700 | 1700 | -     | -     | trace | -     |
| 6-Aminohexanoic acid, tri-TMS       | 25688-76-0   | 1736 | 1739 | -     | 0.03  | -     | -     |
| Putrescine, tetra-                  | 39772-63-9   | 1751 | 1749 | 0.72  | 0.42  | 1.54  | 1.49  |
| Xylitol, penta-TMS                  | 14199-72-5   | 1758 | 1750 | 0.28  | -     | 0.18  | 0.47  |
| NN (73,147,174,273,215)             | -            | 1759 | -    | -     | 0.24  | -     | -     |
| Ribitol, penta-TMS                  | 323811-53-6  | 1762 | 1763 | 0.10  | 0.22  | 0.47  | 0.44  |
| Arabinitol, penta-TMS               | 25138-28-7   | 1767 | 1772 | -     | 0.04  | -     | -     |
| Vanillic acid, di-TMS               | 2078-15-1    | 1773 | 1776 | -     | -     | -     | -     |
| ( <i>E</i> )-Aconitic acid, tri-TMS | 55530-72-8   | 1774 | -    | -     | 0.09  | -     | -     |
| N-Acetylputrescine, di-TMS          | N/A          | 1779 | 1774 | -     | 0.21  | -     | -     |
| NN (73,273,147,75,89)               | -            | 1790 | -    | -     | 0.16  | -     | -     |
| Glutamine, N,N,O-tri-TMS            | 70591-28-5   | 1793 | 1796 | -     | -     | 0.74  | 0.32  |
| $\alpha$ -Glycerophosphate          | 31038-11-6   | 1796 | 1798 | 0.69  | 0.28  | 2.33  | 3.31  |
| NN                                  | -            | 1803 | -    | -     | -     | -     | 0.20  |
| Hypoxanthine, N,O-di-TMS            | 17962-89-9   | 1816 | 1812 | -     | -     | 0.75  | 0.33  |
| Xylonic acid, penta-TMS?            | N/A          | 1822 | -    | -     | 0.02  | trace | 0.70  |
| Cyclohexanepentol, penta-TMS        | N114656-62-1 | 1834 | 1832 | -     | 0.02  | 0.22  | -     |
| $\alpha$ -Fructofuranose, penta-TMS | N/A          | 1843 | 1844 | 0.98  | 0.66  | 1.75  | 2.49  |
| Cadaverine, tetra-TMS               | 65898-76-2   | 1848 | -    | 0.33  | 1.00  | -     | -     |
| $\beta$ -Fructofuranose, penta-TMS  | N/A          | 1851 | 1854 | 0.65  | 13.16 | 2.83  | 1.74  |
| Tetradecanoic acid, mono-TMS        | 18603-17-3   | 1852 | 1853 | -     | -     | -     | -     |
| Isocitric acid, TMS                 | 14330-97-3   | 1860 | 1862 | 29.51 | 27.06 | 0.09  | 3.00  |
| Lysine, N',N',O-tri                 | 24595-69-5   | 1864 | 1860 | -     | 0.02  | -     | 1.05  |
| Pinitol, penta-TMS                  | N/A          | 1870 | 1871 | 0.38  | -     | 0.19  | 0.18  |
| 9-Nonadecene                        | 31035-07-1   | 1872 | 1880 | -     | -     | -     | -     |
| Adenine, N,N'-di-TMS                | 17995-04-9   | 1875 | 1874 | -     | -     | -     | 0.29  |
| Histamine, tri-TMS                  | N/A          | 1887 | 1886 | 5.74  | 18.25 | 1.81  | 0.35  |
| $\beta$ -Fructopyranose, penta-TMS  | N/A          | 1887 |      | -     | -     | 0.24  | trace |
| $\beta$ -Glucopyranose, penta-TMS   | N/A          | 1888 |      | -     | -     | 0.78  | 0.91  |
| $\alpha$ -Sorbopyranose, penta-TMS  | 30645-02-4   | 1904 | 1903 | -     | -     | 0.19  | -     |
| Sebacic acid, di-TMS                | 18408-42-9   | 1905 | 1906 | -     | -     | trace | -     |
| Vanilpropionic acid, di-TMS         | 56051-49-1   | 1908 | 1905 | -     | -     | 0.08  | 0.15  |
| Glycylglycine, N,N,O,O-tetra-TMS    | 6000-14-2    | 1912 | -    | -     | -     | -     | trace |
| Gluconic acid, d-lactone            | 55515-29-2   | 1920 | 1919 | -     | 0.53  | 0.18- | 0.35  |
| Phenyl ethanolamine, N,O,O-tri-TMS  | 68595-84-6   | 1924 | 1921 | 0.21  | -     | -     | -     |
| $\alpha$ -Glucopyranose, penta-TMS  | 3327-61-5    | 1934 | 1932 | 0.82  | 3.03  | 5.41  | 7.15  |
| $\beta$ -Mannopyranose, penta-TMS   | 55529-69-6   | 1943 | 1943 | -     | 0.04  | 0.13  | 0.35  |
| Lysine, tetra-TMS                   | 55429-07-7   | 1946 | 1944 | -     | 0.02  | 0.49  | -     |
| Noadrenaline, tetra-TMS             | 68595-65-3   | 1951 | -    | -     | 0.50  | 0.16  | -     |

|                                                       |            |       |      |       |       |       |      |
|-------------------------------------------------------|------------|-------|------|-------|-------|-------|------|
| Aminocarbohydrate, TMS (203,73,204,147,131,355...539) | -          | 1951  | -    | 0.13  | -     | -     | -    |
| Aminocarbohydrate, TMS (203,73,204,147,131,355...539) | -          | 1957  | -    | 1.17  | trace | --    | -    |
| Aminocarbohydrate, TMS (131,73,147,132,75...539)      | -          | 1964  | -    | 0.24  | 0.03  | -     | -    |
| Carbohydrate derivative, TMS                          | -          | 1965  | -    | -     | -     | -     | 0.35 |
| Mannitol, hexa-TMS                                    | 14317-07-8 | 1968  | 1972 | 0.04  | 0.59  | 0.77  | 1.34 |
| Indole-3-acetic acid, di-TMS                          | 56114-66-0 | 1972  | 1977 | -     | -     | -     | -    |
| Glucitol, hexa-TMS                                    | 14199-80-5 | 1981  | -    | -     | 0.24  | 2.00  | 2.76 |
| Gallic acid, tetra-TMS                                | 2078-17-3  | 1986  | 1985 | 0.30  | 0.23  | -     | -    |
| <i>hiro</i> -Inositol, hexa-TMS                       | 29412-25-7 | 1996  | 1997 | -     | 2.02  | -     | -    |
| NN                                                    | -          | 1999- | -    | -     | -     | 0.90  | 1.22 |
| Galactosamine, penta-TMS                              | N/A        | 2003  | 2005 | 0.17  | -     | -     | -    |
| $\beta$ -Glucopyranose, penta-TMS                     | 2775-90-8  | 2032  | 2032 | 0.14  | 1.08  | 6.72  | 9.36 |
| <i>scyllo</i> -Inositol, penta-TMS                    | N/A        | 2036  | 2038 | trace | trae  | -     | -    |
| Palmitelaidic acid, TMS                               | 82326-15-6 | 2036  | 2038 | -     | -     | 0.11  | -    |
| Gluconic acid, hexa-TMS                               | 34290-52-3 | 2045  | 2045 | 0.21  | 4.05  | 2.63  | 2.83 |
| Palmitic acid, TMS                                    | 55520-89-3 | 2052  | 2052 | 0.15  | 0.16  | 0.79  | 1.35 |
| 7-Methyluric acid, tri-TMS                            | N/A        | 2124  | 2124 | -     | -     | trace | 0.12 |
| <i>myo</i> -Inositol, hexa-TMS                        | 2582-79-8  | 2129  | 2128 | 0.85  | 0.44  | 0.31  | 0.21 |
| Oleic alcohol, mono-TMS                               | 78695-25-7 | 2132  | 2136 | -     | 0.04  | -     | -    |
| Uric acid, tetraTMS                                   | N/A        | 2144  | 2140 | -     | -     | 0.40  | 0.90 |
| N-Acetylglucosamine, tetra-TMS?                       | 31980-72-0 | 2150  | 2139 | -     | -     | -     | 0.15 |
| Heptadecanoic acid, TMS                               | 55517-58-3 | 2150  | 2151 | -     | -     | 0.11  | -    |
| 1-Octadecanol, TMS                                    | 18748-98-6 | 2165  | 2164 | -     | -     | 0.11  | -    |
| Isoproterenol, tri-TMS? (355,73,356...412)            | 29522-12-1 | 2174  | -    | -     | 0.04  | -     | -    |
| NN (70,269,73,75,284...429)                           | -          | 2182  | -    | 0.57  | 0.06  | -     | 0.12 |
| Noradrenaline, penta-TMS                              | 56114-59-1 | 2190  | -    | -     | 0.72  | -     | -    |
| Dopamine, tetra-TMS                                   | N/A        | 2213  | -    | -     | 0.07  | -     | -    |
| Linoleic acid, mono-TMS                               | 56259-07-5 | 2215  | 2215 | -     | -     | 0.98  | 0.83 |
| Oleic acid, mono-TMS                                  | 21556-26-3 | 2222  | 2222 | 0.42  | 0.12  | 5.63  | 7.05 |
| Tryptamine, tri-N,N,N'-TMS?                           | 55334-17-3 | 2234  | -    | -     | 0.03  | 0.42  | -    |
| Stearic acid, mono-TMS                                | 18748-91-9 | 2248  | 2250 | trace | 0.09  | 1.48  | 1.46 |
| <i>myo</i> -Inositol phosphate                        | 55518-06-4 | 2259  | 2259 | -     | -     | 0.32  | 0.72 |
| Glucoside, TMS                                        | -          | 2261  | -    | -     | -     | -     | 0.22 |
| Glucoside, TMS                                        | -          | 2266  | -    | -     | -     | -     | 0.24 |
| Glucoside, TMS                                        | -          | 2270  | -    | -     | -     | -     | 0.18 |
| NN                                                    | -          | 2271  | -    | -     | -     | -     | 0.15 |
| Phosphate, TMS                                        | -          | 2288  | -    | -     | -     | -     | 0.14 |
| Carbohydrate derivative, TMS                          | -          | 2290  | -    | -     | -     | -     | 0.17 |
| Carbohydrate derivative, TMS                          | -          | 2295  | -    | -     | -     | -     | 0.23 |
| <i>n</i> -Tricosane                                   | 638-67-5   | 2300  | 2300 | 0.12  | -     | 0.11  | -    |
| Carbohydrate derivative, TMS                          | -          | 2327  | -    | -     | -     | 0.17  | 0.14 |
| Eicosen-1-ol <(Z)>, mono-TMS                          | N/A        | 2334  | 2337 | 3.14  | 0.97  | 1.82  | 3.34 |
| 1-Eicosanol, TMS                                      | N/A        | 2361  | 2360 | -     | -     | 0.34  | 0.18 |
| NN (404)                                              | -          | 2372  | -    | -     | -     | 0.21  | 0.26 |
| 2-O-Glycerol- $\alpha$ -D-galactopyranoside, hexa-TMS | N/A        | 2376  | 2376 | -     | 0.02  | -     | -    |
| Pseudouridine, penta-TMS                              | 53294-25-0 | 2388  | -    | -     | 0.04  | -     | -    |

|                                                |            |      |      |       |       |       |       |
|------------------------------------------------|------------|------|------|-------|-------|-------|-------|
| Carbohydrate derivative, TMS                   | -          | 2388 | -    | -     | -     | 0.16  | 0.17  |
| NN (418>73,419,147)                            | -          | 2390 |      | -     | -     | 0.16  | 0.15  |
| NN (217,73,147,257,259...475) uridine-like     | -          | 2428 | -    | -     | 0.32  | -     |       |
| NN                                             | -          | 2428 | -    | 0.01  | -     | 0.13  | 0.48  |
| Eicosanoic acid, TMS                           | 55530-70-6 | 2449 | 2448 | -     | -     | 0.05  | trace |
| Uridine, tri-TMS                               | 10457-16-6 | 2472 | 2470 | 0.99  | 0.32  | -     | -     |
| 9-Pentacosene                                  | N/A        | 2475 | 2470 | -     | -     | 0.04  | -     |
| Serotonin, tetra-TMS                           | 55429-74-8 | 2486 | -    | -     | 0.04  | -     | -     |
| <i>n</i> -Pentacosane                          | 629-99-2   | 2500 | 2500 | 0.12  | 0.05  | 0.09  | -     |
| 1-Docosanol, TMS                               | 41755-60-6 | 2558 | 2557 | -     | -     | 0.06  | trace |
| Galactitol derivative (73,319,204,205,217,307) | -          | 2585 | -    | -     | 0.04  | -     | -     |
| Carbohydrate derivative, TMS                   |            | 2605 |      | -     | -     | -     | 0.12  |
| Inosine riboside, tetra-TMS                    | N/A        | 2613 | 2614 | 1.91  | 0.80  | -     | 0.56  |
| Carbohydrate derivative, TMS                   |            | 2626 |      | -     | -     | 0.09  | 0.15  |
| Docosanoic acid, TMS                           | 74367-36-5 | 2644 | 2645 | -     | -     | 0.10  | trace |
| NN (73,147,515,217,425,630)                    | -          | 2656 | -    | 0.25  | -     | 0.13  | -     |
| NN                                             | -          | 2690 |      | -     | -     | 0.36  | 0.15  |
| NN                                             | -          | 2699 |      | -     | -     | -     | 0.14  |
| <i>n</i> -Heptacosane                          | 593-49-7   | 2700 | 2700 | 0.69  | 0.09  | 0.23  | -     |
| Disaccharide, octa-TMS                         | -          | 2705 | -    | -     | -     | 0.21  | -     |
| Sucrose, octa-TMS                              | 19159-25-2 | 2719 | 2714 | 15.85 | 2.97  | trace | -     |
| NN (73,103,147,217,574,307)                    | -          | 2735 | -    | 1.16  | 0.10  |       | -     |
| 1-Tetracosanol, TMS                            | N/A        | 2755 | 2754 | -     | -     | 0.08  | trace |
| Cellobiose, octa-TMS, isomer-1                 | 56145-25-6 | 2762 | 2762 | 0.15  | 0.09  | -     | -     |
| $\alpha$ -Glyceryl oleate, di-TMS              | 54284-47-8 | 2778 | 2779 | 0.08  | -     | -     | 0.23  |
| Disaccharide (73,361,147,204,217)              | -          | 2778 | -    | -     | 0.03  | --    | -     |
| Disaccharide (73,361,147,204,217)              | -          | 2783 | -    | -     | 0.04  | -     | -     |
| NN (73,252,245,217,230...571) inosine-like     | -          | 2805 | -    | 0.38  | 0.45  | -     | -     |
| $\alpha$ -Glyceryl stearate, di-TMS            | 1188-75-6  | 2808 | 2805 | -     | -     | -     | 0.66  |
| Trehalose, octa-TMS                            | 42390-78-3 | 2814 |      | 2.91  | 1.52  | 0.26  | 1.02  |
| Guanosine, penta-TMS                           | N/A        | 2829 | -    | 0.16  | 0.04  | -     | -     |
| Palatinose, octa-TMS                           | N/A        | 2838 | 2832 | -     | -     | 0.42  | 0.25  |
| Leucrose, octa-TMS                             | N/A        | 2885 | 2885 | -     | 0.04  | -     | -     |
| 1-Eicosylglycerol, di-TMS                      | N/A        | 2890 | 2884 | 0.62  | 0.03  | -     | 0.08  |
| Cellobiose, octa-TMS, isomer-2                 | -N/A       | 2894 | -    | 0.17  | -     | 0.21  | -     |
| <i>n</i> -Nonacosane                           | 630-03-5   | 2900 | 2900 | trace | trace | -     | -     |
| Disaccharide, TMS (217,204,73,147,103)         | -          | 2942 | -    | 0.08  | 0.06  | 0.07  | -     |
| 1-Hexacosanol, TMS                             | N/A        | 2953 | 2951 | -     | -     | 0.10  |       |
| $\beta$ -Isomaltose, octa-TMS                  | N/A        | 3007 | 3005 | -     | -     | 0.08  | -     |
| 9-Triacontene                                  | N/A        | 3076 | 3078 | 0.22  | 0.03  | 0.10  | -     |
| 7-Triacontene                                  | N/A        | 3083 | 3082 | 0.14  | 0.03  | 0.21  | -     |
| 24-Methylenecholesterol, mono-TMS              | N/A        | 3251 | 3244 | -     | -     | 1.33  | 1.08  |
| 7-Tritriacontene                               | N/A        | 3278 | 3278 | 0.39  | 0.10  | -     |       |
| $\beta$ -Sitosterol, mono-TMS                  | 2625-46-9  | 3348 | 3345 | -     | -     | 0.16  | 0.14  |
| Isofucosterol, mono-TMS                        | N/A        | 3364 | 3363 | -     | -     | 0.37  | 0.42  |
| Palmitate                                      | -          | 3422 | -    | -     | -     | 0.91  | -     |

|                        |     |       |      |      |       |      |   |
|------------------------|-----|-------|------|------|-------|------|---|
| 1-Kestose, undeca-TMS  | N/A | 3518  | 3515 | 0.27 | 0.07  | -    | - |
| Erlose, undeca-TMS     | N/A | 3555  | 3549 | 1.26 | 0.07  | -    | - |
| Melizitose, undeca-TMS | N/A | 3590  | 3588 | 0.77 | trace | -    | - |
| NN (m/z 255,129,73)    | -   | 3735  | -    | -    | -     | 0.15 | - |
| NN (m/z 255,129,73)    | -   | 3927  | -    | -    | -     | 0.54 | - |
| Oleate                 | -   | 3935  | -    | -    | -     | 0.10 | - |
| Palmitate              | -   | >4000 | -    | -    | -     | 0.99 | - |
